# Supplementary material
Source: PubMed Central journal article supplement (PMC5837709)
Supplement: references_as_supplementary_material_ehx445.pdf [file references_as_supplementary_material_ehx445.pdf]

## Title: ESC Apps for Atrial Fibrillation

### References

1. Kirchhof P, Benussi S, Kotecha D, Ahlsson A, Atar D, Casadei B, Castella M, Diener HC, Heidbuchel H, Hendriks J, Hindricks G, Manolis AS, Oldgren J, Popescu BA, Schotten U, Van Putte B, Vardas P, Agewall S, Camm J, Baron Esquivias G, Budts W, Carerj S, Casselman F, Coca A, De Caterina R, Deftereos S, Dobrev D, Ferro JM, Filippatos G, Fitzsimons D, Gorenek B, Guenoun M, Hohnloser SH, Kolh P, Lip GY, Manolis A, McMurray J, Ponikowski P, Rosenhek R, Ruschitzka F, Savelieva I, Sharma S, Suwalski P, Tamargo JL, Taylor CJ, Van Gelder IC, Voors AA, Windecker S, Zamorano JL, Zeppenfeld K. 2016 ESC Guidelines for the management of atrial fibrillation developed in collaboration with EACTS. *Eur Heart J*. 2016;**37**:2893-2962
2. Lane DA, Skjoth F, Lip GYH, Larsen TB, Kotecha D. Temporal Trends in Incidence, Prevalence, and Mortality of Atrial Fibrillation in Primary Care. *J Am Heart Assoc*. 2017;**6**:e005155
3. Nieuwlaat R, Olsson SB, Lip GY, Camm AJ, Breithardt G, Capucci A, Meeder JG, Prins MH, Levy S, Crijns HJ, Euro Heart Survey I. Guideline-adherent antithrombotic treatment is associated with improved outcomes compared with undertreatment in high-risk patients with atrial fibrillation. The Euro Heart Survey on Atrial Fibrillation. *Am Heart J*. 2007;**153**:1006-1012
4. Qin D, Leef G, Alam MB, Rattan R, Munir MB, Patel D, Khattak F, Vaghasia N, Adelstein E, Jain SK, Saba S. Patient outcomes according to adherence to treatment guidelines for rhythm control of atrial fibrillation. *J Am Heart Assoc*. 2015;**4**
5. Lip GY, Laroche C, Popescu MI, Rasmussen LH, Vitali-Serdoz L, Dan GA, Kalarus Z, Crijns HJ, Oliveira MM, Tavazzi L, Maggioni AP, Boriani G. Improved outcomes with European Society of Cardiology guideline-adherent antithrombotic treatment in high-risk patients with atrial fibrillation: a report from the EORP-AF General Pilot Registry. *Europace*. 2015;**17**:1777-1786
6. Seaburg L, Hess EP, Coylewright M, Ting HH, McLeod CJ, Montori VM. Shared decision making in atrial fibrillation: where we are and where we should be going. *Circulation*. 2014;**129**:704-710
7. Lane DA, Aguinaga L, Blomstrom-Lundqvist C, Boriani G, Dan GA, Hills MT, Hylek EM, LaHaye SA, Lip GY, Lobban T, Mandrola J, McCabe PJ, Pedersen SS, Pisters R, Stewart S, Wood K, Potpara TS, Gorenek B, Conti JB, Keegan R, Power S, Hendriks J, Ritter P, Calkins H, Violi F, Hurwitz J. Cardiac tachyarrhythmias and patient values and preferences for their management: the European Heart Rhythm Association (EHRA) consensus document endorsed by the Heart Rhythm Society (HRS), Asia Pacific Heart Rhythm Society (APHRS), and Sociedad Latinoamericana de Estimulacion Cardiaca y Electrofisiologia (SOLEACE). *Europace*. 2015;**17**:1747-1769
8. Hendriks JM, de Wit R, Crijns HJ, Vrijhoef HJ, Prins MH, Pisters R, Pison LA, Blaauw Y, Tieleman RG. Nurse-led care vs. usual care for patients with atrial fibrillation: results of a randomized trial of integrated chronic care vs. routine clinical

- care in ambulatory patients with atrial fibrillation. *Eur Heart J*. 2012;**33**:2692-2699
9. Free C, Phillips G, Galli L, Watson L, Felix L, Edwards P, Patel V, Haines A. The effectiveness of mobile-health technology-based health behaviour change or disease management interventions for health care consumers: A systematic review. *PLoS Med*. 2013;**10**:e1001362
  10. Attwell G, Hughes J. Pedagogic Approaches to Using Technology for Learning - Literature Review. *Lifelong Learning UK*. 2010; **Accessed online (05 Jan 2016):** <http://dera.ioe.ac.uk/id/eprint/2021>
  11. Gillebert TC, Brooks N, Fontes-Carvalho R, Fras Z, Gueret P, Lopez-Sendon J, Salvador MJ, van den Brink RB, Smiseth OA, Griebenow R. ESC core curriculum for the general cardiologist (2013). *Eur Heart J*. 2013;**34**:2381-2411
  12. Astin F, Carroll D, De Geest S, Fernandez-Oliver AL, Holt J, Hinterbuchner L, Jennings C, Jones I, Ketchell A, Kletsiou E, Ruppert T, Bustelo AS, Serafin A, Uchmanowicz I. A Core Curriculum for the Continuing Professional Development of Nurses Working in Cardiovascular Settings: Developed by the Education Committee of the Council on Cardiovascular Nursing and Allied Professions (CCNAP) on behalf of the European Society of Cardiology. *Eur J Cardiovasc Nurs*. 2015;**14**:S1-17
  13. Kotecha D, Calvert M, Deeks JJ, Griffith M, Kirchhof P, Lip GYH, Mehta S, Slinn G, Stanbury M, Steeds RP, Townend JN. A review of rate control in atrial fibrillation, and the rationale and protocol for the RATE-AF trial. *BMJ Open*. 2017: in press; DOI: 10.1136/bmjopen-2016-015099
  14. Hendriks JM, Luermans JG. *De diagnose boezemfibrilleren – wat kan ik zelf doen? [The diagnosis of atrial fibrillation - what can I do?]*. The Hague: Academic Pharmaceutical Productions BV; 2014.
  15. Jin M, Kim J. Development and evaluation of an evaluation tool for healthcare smartphone applications. *Telemed J E Health*. 2015;**21**:831-837
  16. Wyatt JC, Thimbleby H, Rastall P, Hoogewerf J, Wooldridge D, Williams J. What makes a good clinical app? Introducing the RCP Health Informatics Unit checklist. *Clin Med*. 2015;**15**:519-521
  17. Hibbard JH, Greene J. What the evidence shows about patient activation: better health outcomes and care experiences; fewer data on costs. *Health Aff (Millwood)*. 2013;**32**:207-214
  18. Elwyn G, Frosch D, Thomson R, Joseph-Williams N, Lloyd A, Kinnersley P, Cording E, Tomson D, Dodd C, Rollnick S, Edwards A, Barry M. Shared decision making: a model for clinical practice. *J Gen Intern Med*. 2012;**27**:1361-1367
  19. Pew Research Center. Older adults and technology use. 2014; **Accessed online (18 Apr 2016):** <http://www.pewinternet.org/2014/04/03/older-adults-and-technology-use/>
  20. Mohadis HM, Ali NM. A study of smartphone usage and barriers among the elderly. *2014 3rd International Conference on User Science and Engineering (i-USER)*. 2014; DOI: 10.1109/IUSER.2014.7002686:109-114
